# Supplementary material for: CNV Detection from Exome Sequencing Data in Routine Diagnostics of Rare Genetic Disorders: Opportunities and Limitations
Source: MDPI journal article supplement (doi:10.3390/genes12091427), 2021-09-16
Supplement: s1 [file s1]

| Case (Phase) | Disease Category | Clinical description        | NGS library | NGS CNV coordinates (GRCh37) + size + gene if small CNV   | CNV validation | aCGH CNV results (GRCh37)                                  | Comment                                |
|--------------|------------------|-----------------------------|-------------|-----------------------------------------------------------|----------------|------------------------------------------------------------|----------------------------------------|
| Case 22 (2)  | NG               | Ataxia                      | ES          | chr1:161275667-161310445 x3 >34kb – including <i>MPZ</i>  | aCGH 180k      | 1q23.3(161275175_161316088)x3 >41kb – including <i>MPZ</i> | Same CNV present in the healthy mother |
| Case 23 (3)  | Renal disease    | Renal malformation          | ES          | chr12:66709023-66747343 x3 >38kb – including <i>GRIP1</i> | no             | aCGH not done                                              | + <i>GRIP1</i> c.260G>A, p.Gly87Glu    |
| Case 24 (2)  | NDD              | DD, language delay, obesity | ES          | chr1:160765979-161228773x3 >462kb                         | aCGH 180k      | 1q23.3(160676568_161291124)x3 >615kb                       | Mosaicism of the duplication (50-55%)  |

DD: Developmental Delay; ES: Exome Sequencing; kb: Kilobase pair; Mb: Megabase pair; NDD: Neurodevelopmental disorder; NG: Neurodegeneration.

**Table S3:** CNVs classified as VUS.
