# Supplementary material for: CNV Detection from Exome Sequencing Data in Routine Diagnostics of Rare Genetic Disorders: Opportunities and Limitations
Source: MDPI journal article supplement (doi:10.3390/genes12091427), 2021-09-16
Supplement: s1 [file s1]

| Type  | Annotation                                     | Details                                                                                                                                                                                                                                                                                 |
|-------|------------------------------------------------|-----------------------------------------------------------------------------------------------------------------------------------------------------------------------------------------------------------------------------------------------------------------------------------------|
| CNV   | Localisation                                   | Genomic coordinates of the CNV (GRCh37)<br>+ Cytoband (GRCh37)                                                                                                                                                                                                                          |
|       | Minimal size of the CNV                        | In base pair                                                                                                                                                                                                                                                                            |
|       | Minimal number of exons impacted               | Equivalent to the number of targets inside the CNV boundaries in the sequencing library                                                                                                                                                                                                 |
|       | Ploidy and quality, via the reads' ratio       | Ratio of observed reads in the CNV versus average reads of the reference: <ul style="list-style-type: none"> <li>- ratio= 1 : 2 normal copies,</li> <li>- +/- 0.5 : loss of 1 copy, +/- 0 : loss of 2 copies</li> <li>- +/- 1.5 : gain of 1 copy, +/- 1.8 : gain of 2 copies</li> </ul> |
|       | Frequency                                      | <ul style="list-style-type: none"> <li>- in the batch under process</li> <li>- in the internal database of NGS patients (ES SSV7 and TsoE)</li> <li>- in control database (Konrad), provided by ExomeDepth software</li> </ul>                                                          |
|       | Known pathogenic CNVs                          | Extracted from the OMIM database, for large CNVs. CNVs detected in our patients might be inside those known pathogenic CNVs, overlapping with them or bigger than them.                                                                                                                 |
|       | 180K and 1M aCGH targets                       | Number of targets from 180K and 1M aCGH, inside the CNV boundaries.                                                                                                                                                                                                                     |
|       | pTer and qTer flag                             | Flag CNVs close to the pTer and qTer regions of the chromosomes, by calculating the number of available library targets before (for pTer) and after (for qTer) the CNV.                                                                                                                 |
| Genes | RefGenes                                       | Genes names from RefGenes present in the CNV                                                                                                                                                                                                                                            |
|       | OMIM                                           | Disease description of genes present in the CNV                                                                                                                                                                                                                                         |
|       | Domino                                         | Domino score (Dominant/Recessif) of genes present in the CNV                                                                                                                                                                                                                            |
|       | Haploinsufficiency/<br>Triplosensitivity score | ClinGen Dosage Sensitivity Map ( <a href="https://dosage.clinicalgenome.org/">https://dosage.clinicalgenome.org/</a> )                                                                                                                                                                  |

**Table S1: Details of the CNV annotations in the pipeline.**
