# Supplementary material for: CNV Detection from Exome Sequencing Data in Routine Diagnostics of Rare Genetic Disorders: Opportunities and Limitations
Source: MDPI journal article supplement (doi:10.3390/genes12091427), 2021-09-16
Supplement: s1 [file s1]

| Case   | Disease Category | Original technique | CNV results (GRCh37) aCGH /MLPA size + gene of interest          | CNV coordinates from NGS (GRCh37)                             |
|--------|------------------|--------------------|------------------------------------------------------------------|---------------------------------------------------------------|
| Case A | NDD              | 180k aCGH          | 22q13.33(51123491-51178264) x1<br>55kb – including <i>SHANK3</i> | chr22:51123014-51220722 x1<br>>97kb – including <i>SHANK3</i> |
| Case B | NG               | MLPA PMP22         | 14q11.2(20002226-20404761) x1<br>106bp – <i>PMP22</i> (exon 5)   | chr14:20002226-20404761 x1<br>106bp – <i>PMP22</i> (exon 5)   |
| Case C | NDD              | 180k aCGH          | 16q11.2(28824794-29042118) x1<br>217kb – including <i>SH2B1</i>  | chr16:28834582-29064047 x1<br>>229kb – including <i>SH2B1</i> |
| Case D | NDD              | 180k aCGH          | Xp11.22(52954520-53742476) x3<br>>788kb – including <i>HUWE1</i> | chrX:53105805-53681051 x3<br>>575kb - including <i>HUWE1</i>  |
| Case E | NDD              | 180k aCGH          | 22q11.21(18894835-21801661) x3<br>>2.9Mb                         | chr22:18893889-21481925 x3<br>>2.58Mb                         |

Kb: Kilobase pair; Mb: Megabase pair; NDD: Neurodevelopmental disorder; NG: Neurodegeneration.

**Table S2:** List of patients from Phase 1, to parametrize the NGS-based CNV pipeline.
