# Supplementary material for: CNV Detection from Exome Sequencing Data in Routine Diagnostics of Rare Genetic Disorders: Opportunities and Limitations
Source: MDPI journal article supplement (doi:10.3390/genes12091427), 2021-09-16
Supplement: s1 [file s1]

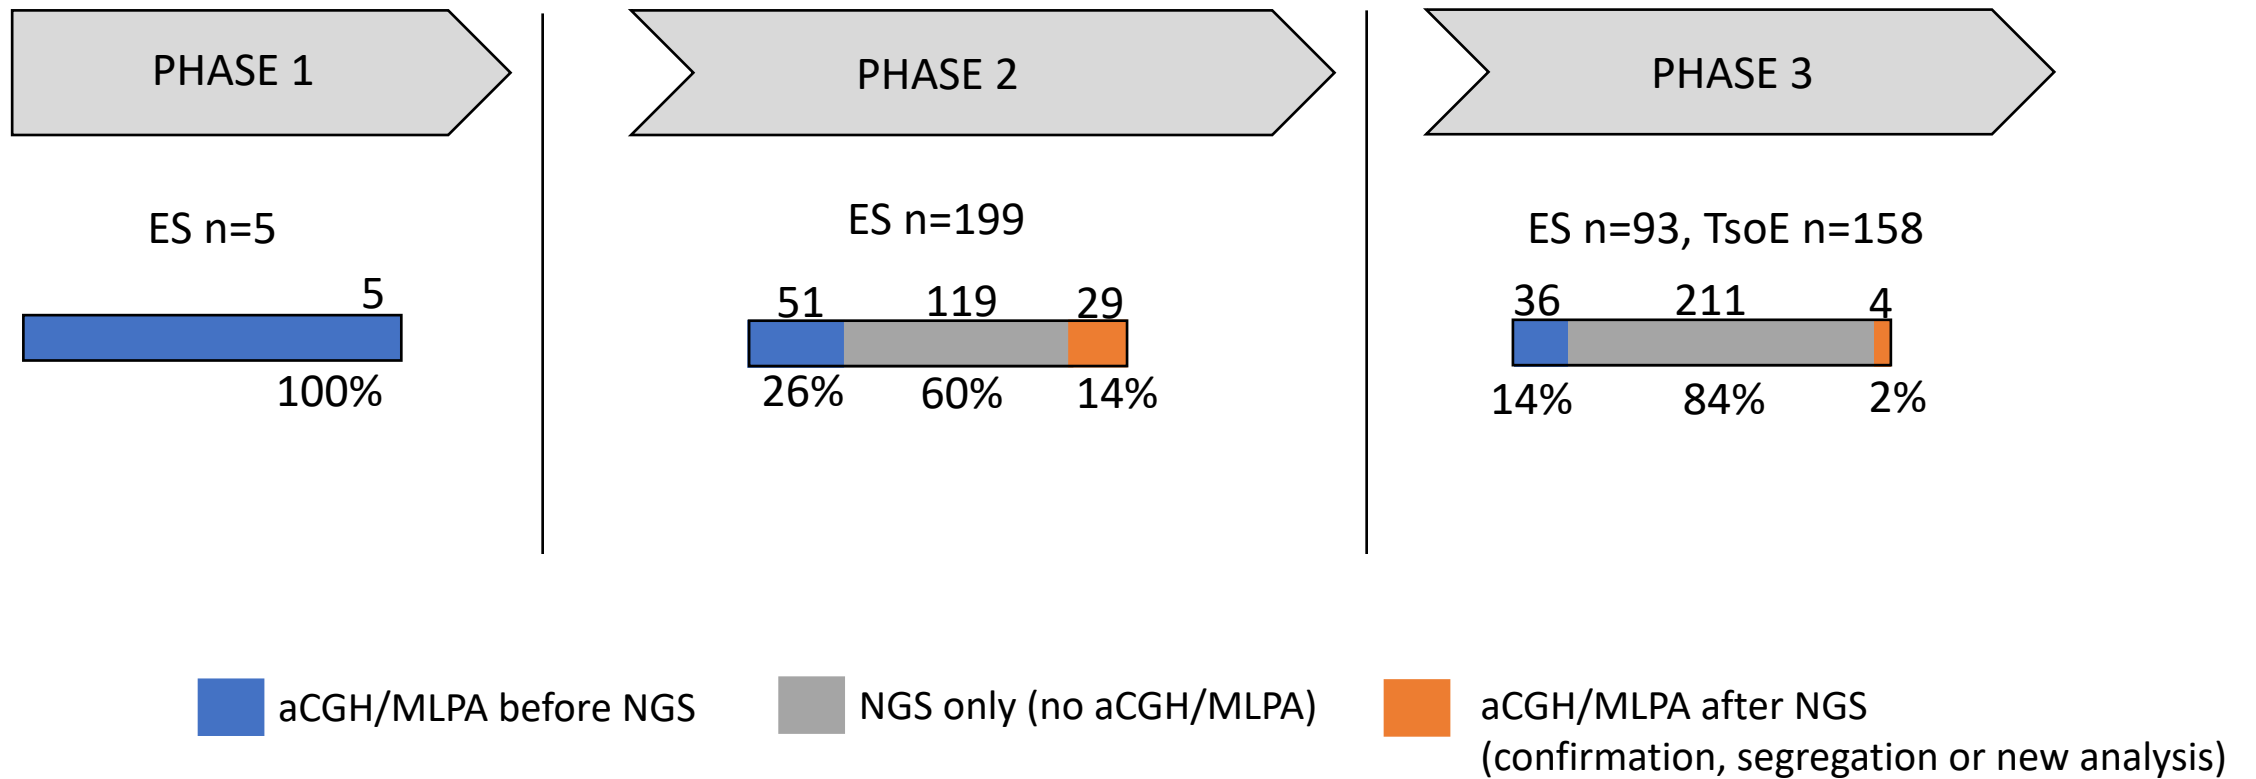

**Figure S1 : Study design and patients enrolled in each phase.** Number of NGS patients in each phase, and which sequencing methods were used for each of them. *ES: Exome Sequencing; TsoE: TruSightOne Expanded.*
