# Supplementary material for: CNV Detection from Exome Sequencing Data in Routine Diagnostics of Rare Genetic Disorders: Opportunities and Limitations
Source: MDPI journal article supplement (doi:10.3390/genes12091427), 2021-09-16
Supplement: s1 [file s1]

| Case (Phase) | CNV coordinates of the largest boundaries detected (GRCh37) | cytoband       | Minimal size of the CNV | Classification    | Criteria                                                                                 | Genes in the CNV (mim morbid genes underlined)                                                                                                                                                                                                                                                                                                                                                                                                                                                                                                                                                                                       | Gene(s) responsible for the phenotype |
|--------------|-------------------------------------------------------------|----------------|-------------------------|-------------------|------------------------------------------------------------------------------------------|--------------------------------------------------------------------------------------------------------------------------------------------------------------------------------------------------------------------------------------------------------------------------------------------------------------------------------------------------------------------------------------------------------------------------------------------------------------------------------------------------------------------------------------------------------------------------------------------------------------------------------------|---------------------------------------|
| Case 1 (2)   | chr22: 44481506-51220722 x1                                 | 22q13.31q13.33 | >6.7Mb                  | Pathogenic        | Known syndrome (MIM: #606232)                                                            | <i>PARVB, PARVG, KIAA1644, LDOC1L, PRR5, PRR5-ARHGAP8, ARHGAP8, PHF21B, NUP50, KIAA0930, <u>UPK3A</u>, FAM118A, SMC1B, RIBC2, <u>FBLN1</u>, <u>ATXN10</u>, WNT7B, C22orf26, <u>PPARA</u>, CDPF1, PKDREJ, TTC38, GTSE1, <u>TRMU</u>, <u>CELSR1</u>, GRAMD4, CERK, TBC1D22A, FAM19A5, C22orf34, BRD1, ZBED4, <u>ALG12</u>, CRELD2, PIM3, IL17REL, TTLL8, <u>MLC1</u>, MOV10L1, PANX2, TRABD, <u>TUBGCP6</u>, HDAC10, MAPK12, MAPK11, PLXNB2, DENND6B, PPP6R2, <u>SBF1</u>, ADM2, MIOX, LMF2, NCAPH2, <u>SCO2</u>, <u>TYMP</u>, ODF3B, KLHDC7B, SYCE3, CPT1B, CHKB-CPT1B, CHKB, MAPK8IP2, <u>ARSA</u>, <u>SHANK3</u>, ACR, RABL2B</i>   | <i>SHANK3</i>                         |
| Case 2 (2)   | chr15: 22765628-28632839 x3                                 | 15q11.2q13.1   | >5.8Mb                  | Pathogenic        | Known syndrome (MIM: #608636)                                                            | <i>TUBGCP5, CYFIP1, NIPA2, <u>NIPA1</u>, GOLGA8I, GOLGA8S, GOLGA6L2, MKRN3, MAGEL2, <u>NDN</u>, NPAP1, SNRPN, SNURF, <u>UBE3A</u>, <u>ATP10A</u>, <u>GABRB3</u>, GABRA5, GABRG3, <u>OCA2</u>, <u>HERC2</u>, GOLGA8F</i>                                                                                                                                                                                                                                                                                                                                                                                                              | PWACR region (BP1-BP3)                |
| Case 3 (2)   | chr13:103298645-103301836 x0                                | 13q33.1        | >4.4Kb                  | Pathogenic        | See article [31]                                                                         | <i><u>TPP2</u></i>                                                                                                                                                                                                                                                                                                                                                                                                                                                                                                                                                                                                                   | <i>TPP2</i>                           |
| Case 4 (2)   | chr14: 99634561-107278770 x3                                | 14q32.2q32.33  | >7.6Mb                  | Likely pathogenic | Dozen of patients with similar duplication (ORPHA: 1705), large CNV, absent from control | <i>BCL11B, SETD3, CCNK, CCDC85C, HHIPL1, CYP46A1, EML1, EVL, DEGS2, YY1, SLC25A29, SLC25A47, WARS, WDR25, BEGAIN, DLK1, RTL1, DIO3, PPP2R5C, <u>DYNCH1</u>, HSP90AA1, WDR20, MOK, ZNF839, CINP, <u>TECPR2</u>, ANKRD9, RCOR1, <u>TRAF3</u>, <u>AMN</u>, CDC42BPB, EXOC3L4, TNFAIP2, EIF5, MARK3, CKB, TRMT61A, BAG5, KLC1, APOPT1, <u>XRCC3</u>, ZFYVE21, PPP1R13B, C14orf2, TDRD9, RD3L, ASPG, KIF26A, C14orf144, TMEM179, C14orf180, <u>INF2</u>, ADSSL1, SIVA1, <u>AKT1</u>, ZBTB42, CEP170B, PLD4, AHNAK2, C14orf79, CDCA4, GPR132, JAG2, NUDT14, BRF1, BTBD6, PACS2, TEX22, MTA1, CRIP2, CRIP1, C14orf80, TMEM121, KIAA0125</i> | 14q32.2 locus ( <i>DKL1/RTL1</i> )    |
| Case 5 (2)   | chrX: 107182490-108105721 x0                                | Xq22.3         | >900kb                  | Pathogenic        | Haploinsufficiency of <i>COL4A5</i> (ISCA-11460)                                         | <i>TEX13B, VSIG1, PSMD10, ATG4A, COL4A6, <u>COL4A5</u>, <u>IRS4</u></i>                                                                                                                                                                                                                                                                                                                                                                                                                                                                                                                                                              | <i>COL4A5, IRS4</i>                   |

|                    |                                                                                                   |                                       |                              |            |                                               |                                                                                                                                                                                                                                                                                                                                                                                                                                                                            |                                                                                                  |
|--------------------|---------------------------------------------------------------------------------------------------|---------------------------------------|------------------------------|------------|-----------------------------------------------|----------------------------------------------------------------------------------------------------------------------------------------------------------------------------------------------------------------------------------------------------------------------------------------------------------------------------------------------------------------------------------------------------------------------------------------------------------------------------|--------------------------------------------------------------------------------------------------|
| <b>Case 6 (2)</b>  | chr2: 236980552-243041364 x1                                                                      | 2q37.2q37.3                           | >6Mb                         | Pathogenic | Known syndrome (MIM: #600430)                 | <i>AGAP1, GBX2, ASB18, IQCA1, ACKR3, COPS8, COL6A3, MLPH, PRLH, RAB17, LRRFIP1, RBM44, RAMP1, UBE2F, UBE2F-SCLY, SCLY, ESPNL, KLHL30, FAM132B, ILKAP, HES6, PER2, TRAF3IP1, ASB1, TWIST2, HDAC4, NDUFA10, OR6B2, PRR21, OR6B3, MYEOV2, OTOS, GPC1, ANKMY1, DUSP28, RNPEPL1, CAPN10, GPR35, AQP12B, AQP12A, KIF1A, AGXT, C2orf54, SNED1, MTERFD2, PASK, PPP1R7, ANO7, HDLBP, SEPT2, FARP2, STK25, BOK, THAP4, ATG4B, DTYMK, ING5, D2HGDH, GAL3ST2, NEU4, PDCD1, CXXC111</i> | <i>HDAC4</i> is contributing, but not sufficient to cause the phenotype. Other genes are unknown |
| <b>Case 7 (2)</b>  | chr10: 125757754-128860040 x3;<br>chr10: 130764002_131513932 x3;<br>chr10: 131528966-135434178 x1 | 10q26.13q26.2;<br>10q26.3;<br>10q26.3 | >3.1 Mb;<br>750kb;<br>>3.9Mb | Pathogenic | Known syndrome (MIM: #609625)                 | <i>CHST15, QAT, NKX1-2, LHPP, FAM53B, METTL10, FAM175B, ZRANB1, CTBP2, TEX36, EDRF1, MMP21, UROS, BCCIP, DHX32, FANK1, ADAM12, C10orf90, DOCK, MGMT, EBF3, GLRX3, TCERG1L, PPP2R2D, BNIP3, JAKMIP3, DPYSL4, STK32C, LRRC27, PWWP2B, C10orf91, INPP5A, NKX6-2, TTC40, GPR123, KND1, UTF1, VENTX, ADAM8, TUBGCP2, ZNF511, CALY, PRAP1, FUOM, ECHS1, PAOX, MTG1, SPRN, CYP2E1, SYCE1</i>                                                                                      | <i>EBF3</i>                                                                                      |
| <b>Case 8 (2)</b>  | chr22:18834446-21464119 x1                                                                        | 22q11.21                              | >2.6Mb                       | Pathogenic | Known syndrome (MIM: #192430)                 | <i>DGCR6, PRODH, DGCR2, DGCR14, TSSK2, GSC2, SLC25A1, CLTCL1, HIRA, C22orf39, MRPL40, UFD1L, CDC45, CLDN5, SEPT5, GP1BB, TBX1, GNB1L, C22orf29, TXNRD2, COMT, ARVCF, TANGO2, DGCR8, TRMT2A, RANBP1, ZDHHC8, RTN4R, DGCR6L, GTLC3, RIMBP3, FAM230A, USP41, ZNF74, SCARF2, KLHL22, MED15, PI4KA, SERPIND1, SNAP29, CRKL, AIFM3, LZTR1, THAP7, P2RX6, SLC7A4</i>                                                                                                              | <i>TBX1</i>                                                                                      |
| <b>Case 9 (2)</b>  | chr7: 92776146-94641008 x1                                                                        | 7q21.2q21.3                           | >1.8Mb                       | Pathogenic | Known deletion, <i>SGCE</i> GeneReviews, 2020 | <i>AMD9L, HEPACAM2, CCDC132, CALCR, GNGT1, TFPI2, GNG11, BET1, COL1A2, CASD1, SGCE, PEG10, PPP1R9A</i>                                                                                                                                                                                                                                                                                                                                                                     | <i>SGCE</i>                                                                                      |
| <b>Case 10 (2)</b> | chr17: 1071072-1658551 x3                                                                         | 17p13.3                               | >580Kb                       | Pathogenic | Known syndrome (MIM: #613215)                 | <i>ABR, BHLHA9, TUSC5, YWHAE, CRK, MYO1C, INPP5K, PITPNA, SLC43A2, SCARF1, RILP, PRPF8, TLCD2, WDR81, SERPINF2</i>                                                                                                                                                                                                                                                                                                                                                         | <i>YWHAE</i>                                                                                     |

|                    |                                                       |              |                 |            |                                                                                          |                                                                                                                                                                                                         |                                                                                           |
|--------------------|-------------------------------------------------------|--------------|-----------------|------------|------------------------------------------------------------------------------------------|---------------------------------------------------------------------------------------------------------------------------------------------------------------------------------------------------------|-------------------------------------------------------------------------------------------|
| <b>Case 11 (2)</b> | chr1: 146461120-149243967 x3                          | 1q21.1q21.2  | >2.7Mb          | Pathogenic | Known syndrome (MIM #612475)                                                             | <i>NBPFI2,PRKAB2,FMO5,CHD1L,BCL9,ACP6,GJA5,GJA8,GPR89B,NBPFI24,,PPIAL4A,NBPFI14,PPIAL4D,NBPFI20,NBPFI15,NBPFI16</i>                                                                                     | None known but <i>CHD1L, ACP6, TL3</i> , and <i>ROBO1</i> were labeled as candidates [27] |
| <b>Case 12 (3)</b> | chr15:43892159-43901532 x1                            | 15q15.3      | >9.4Kb          | Pathogenic | Gene known to have partial deletion (biallelic disorder), compound heterozygous with SNV | <i>CKMT1B,STRC</i>                                                                                                                                                                                      | <i>STRC</i>                                                                               |
| <b>Case 13 (3)</b> | chr9:79827886-79828230 x1<br>chr9:80018153-80018237x1 | 9q21.2       | >344bp<br>>84bp | Pathogenic | Gene known to have partial deletion (biallelic disorder), compound heterozygous          | <i>VPSI3A</i>                                                                                                                                                                                           | <i>VPSI3A</i>                                                                             |
| <b>Case 14 (3)</b> | chr3: 69917276-69989173 x1                            | 3p13         | >70Kb           | Pathogenic | Haploinsufficiency of <i>MITF</i> (ISCA-4115)                                            | <i>MITF</i>                                                                                                                                                                                             | <i>MITF</i>                                                                               |
| <b>Case 15 (3)</b> | chrX: 21950459-22180647 x1                            | Xp22.11      | >230Kb          | Pathogenic | Haploinsufficiency of <i>PHEX</i> (ISCA-35047), <i>PHEX</i> GeneReviews, 2017            | <i>SMS, PHEX</i>                                                                                                                                                                                        | <i>PHEX</i>                                                                               |
| <b>Case 16 (3)</b> | chrX: 99551276-99663595 x1                            | Xq22.1       | >112Kb          | Pathogenic | Haploinsufficiency of <i>PCDH19</i> (ISCA-6010), known deletion (HGMD Pro)               | <i>PCDH19</i>                                                                                                                                                                                           | <i>PCDH19</i>                                                                             |
| <b>Case 17 (3)</b> | chr2:32352018_32353548 x1                             | 2p22.3       | >1.53Kb         | pathogenic | Haploinsufficiency of <i>SPAST</i> (ISCA-16468), <i>SPAST</i> GeneReviews, 2019          | <i>SPAST</i>                                                                                                                                                                                            | <i>SPAST</i>                                                                              |
| <b>Case 18 (3)</b> | chr15: 20102541-28772634 x4                           | 15q11.1q13.1 | >8Mb            | Pathogenic | Known syndrome, maternal 15q duplication syndrome GeneReviews, 2021                      | <i>GOLGA6L6,,POTEB2,POTEB,OR4M2,OR4N4,GOLGA6L1,TUBGCP5,CYFIP1,NIPA2,NIPA1,GOLGA8I,GOLGA8S,GOLGA6L2,MKRN3,MAGEL2,NDN,NPAPI,SNRPN,SNURF,UBE3A,ATPI0A,GABRB3,,GABRA5,GABRG3,QCA2,HERC2,GOLGA8F,GOLGA8G</i> | PWACR region (BP1-BP3)                                                                    |

**Table S3: Details of the CNVs discovered by the ES-based CNV pipeline.**

bp: base pair; Kb: Kilobase pair; Mb: Megabase pair, PWACR: Prader Willi Angelman Critical Region
