# Supplementary material for: CNV Detection from Exome Sequencing Data in Routine Diagnostics of Rare Genetic Disorders: Opportunities and Limitations
Source: Genes (Basel). 2021 Sep 16;12(9):1427. doi: 10.3390/genes12091427 (PMC8472439; doi:10.3390/genes12091427)
Supplement: Supplementary file 1 [file genes-12-01427-s001.zip]

Archive with 6 entries (6 files):
- Figure_S1_Royer-Bertrand.pdf
- Figure_S2_Royer-Bertrand.pdf
- Table_S1_Royer-Bertrand_Revision.pdf
- Table_S2_Royer-Bertrand_Revision.pdf
- Table_S3_Royer-Bertrand_Revision_version2.pdf
- Table_S4_Royer-Bertrand_Revision.pdf
